# Supplementary material
Source: publisher site journal article supplement (https://www.spandidos-publications.com/8493/downloadSupplementary)
Supplement: Supplementary file 1 [file downloadSupplementary]

Table SI. Comparison of the biology and summarized tumor microenvironment-related roles of GLP-1, GIP and GCG.

| Feature                                | GLP-1                                                                                                                                                                                                                                                                                             | GIP                                                                                                                                                                                 | GCG                                                                                                                                                                                                                                                                                                                                                                                                                                                                                                                       |
|----------------------------------------|---------------------------------------------------------------------------------------------------------------------------------------------------------------------------------------------------------------------------------------------------------------------------------------------------|-------------------------------------------------------------------------------------------------------------------------------------------------------------------------------------|---------------------------------------------------------------------------------------------------------------------------------------------------------------------------------------------------------------------------------------------------------------------------------------------------------------------------------------------------------------------------------------------------------------------------------------------------------------------------------------------------------------------------|
| Cell source                            | Intestinal L-cells (distal gut)                                                                                                                                                                                                                                                                   | Intestinal K-cells (proximal gut)                                                                                                                                                   | Pancreatic $\alpha$ -cells                                                                                                                                                                                                                                                                                                                                                                                                                                                                                                |
| Primary stimulus for secretion         | Nutrient intake (carbohydrates, fats and proteins)                                                                                                                                                                                                                                                | Nutrient intake (especially fats and carbohydrates)                                                                                                                                 | Hypoglycemia, fasting, sympathetic activation                                                                                                                                                                                                                                                                                                                                                                                                                                                                             |
| Receptor                               | GLP-1R                                                                                                                                                                                                                                                                                            | GIPR                                                                                                                                                                                | GCGR                                                                                                                                                                                                                                                                                                                                                                                                                                                                                                                      |
| Primary signaling pathway              | Gs-mediated cAMP/PKA/Epac signaling                                                                                                                                                                                                                                                               | Gs-mediated cAMP/PKA/Epac signaling                                                                                                                                                 | Gs-mediated cAMP/PKA signaling; Gq-mediated IP3/PKC signaling                                                                                                                                                                                                                                                                                                                                                                                                                                                             |
| Core metabolic function                | Anabolic (postprandial): i) Enhances glucose-dependent insulin secretion; ii) inhibits GCG secretion; iii) slows gastric emptying; and iv) promotes satiety                                                                                                                                       | Anabolic (postprandial): i) Enhances glucose-dependent insulin secretion; and ii) promotes lipid storage in adipose tissue                                                          | Catabolic (fasting): i) Raises blood glucose levels (glycogenolysis and gluconeogenesis); and ii) stimulates lipolysis and ketogenesis                                                                                                                                                                                                                                                                                                                                                                                    |
| Key Clinical Drugs                     | GLP-1RAs such as liraglutide and semaglutide                                                                                                                                                                                                                                                      | Less common as monotherapy; dual GIP/GLP-1 RAs (such as tirzepatide)                                                                                                                | Rare as monotherapy for diabetes; dual GLP-1/GCGR agonists, such as cotadotide and survodotide, are in clinical development.                                                                                                                                                                                                                                                                                                                                                                                              |
| Summary of roles in the TME and cancer | Mostly antitumor effects (context-dependent): Modulates immune cells ( $\downarrow$ NETs, $\uparrow$ NK cell function and polarizes macrophages); inhibits tumor cell proliferation and induces apoptosis; potential pro-tumor effects in specific contexts (for example, in some breast cancers) | Less defined/context-dependent: Shares some signaling with GLP-1, but its role in cancer is less clear; may influence tumor metabolism via its effects on systemic lipid metabolism | Dual/context-dependent role: Potential pro-tumor effects include the possibility that hyperglycemia may fuel tumor growth, while glucagon/GCGR signaling has been reported to promote proliferation in some colorectal cancer models through AMPK deactivation and MAPK activation; putative antitumor relevance remains indirect and is mainly inferred from GCGR-containing polyagonists rather than from GCGR activation alone; current evidence is insufficient to conclude a direct antitumor effect of GCGR agonism |

Data summarized from (15,16,45,61,62,66). AMPK, AMP-activated protein kinase; cAMP, cyclic adenosine monophosphate; CRC, colorectal cancer; Epac, exchange protein directly activated by cAMP; Gs, stimulatory G protein  $\alpha$ -subunit; Gq, Gq protein  $\alpha$ -subunit; GCG, glucagon; GCGR, glucagon receptor; GIP, glucose-dependent insulinotropic polypeptide; GIPR, glucose-dependent insulinotropic polypeptide receptor; GLP-1, glucagon-like peptide-1; GLP-1R, glucagon-like peptide-1 receptor; GLP-1RA, glucagon-like peptide-1 receptor agonist; IP3, inositol 1,4,5-trisphosphate; NET, neutrophil extracellular trap; NK, natural killer; PKA, protein kinase A; PKC, protein kinase C; TME, tumor microenvironment.

Table SII. Role of incretin and glucagon-related drugs in different tumors (*in vivo* and *in vitro* experiments).

| First author/s, year         | Subjects                 | Research type                      | Disease                          | Cell lines                  | Treatment                                | Tumor-related interpretation                          | Main function (result)                                                                                                                                                                                                                                                                                            | (Refs.) |
|------------------------------|--------------------------|------------------------------------|----------------------------------|-----------------------------|------------------------------------------|-------------------------------------------------------|-------------------------------------------------------------------------------------------------------------------------------------------------------------------------------------------------------------------------------------------------------------------------------------------------------------------|---------|
| Zhao <i>et al</i> , 2014     | Mice                     | <i>In vitro</i> and <i>in vivo</i> | Pancreatic cancer                | MIA PaCa-2 and PANC-1       | Liraglutide                              | Positive (antitumor)                                  | Liraglutide activated cAMP production and inhibited Akt and ERK1/2 signaling pathways in a GLP-1R-dependent manner, inhibited the proliferation and promoted apoptosis of human pancreatic cancer cell lines <i>in vitro</i> , and alleviated pancreatic tumor growth in a mouse xenograft model <i>in vivo</i> . | (151)   |
| Zhao <i>et al</i> , 2020     | Mice                     | <i>In vitro</i> and <i>in vivo</i> | Pancreatic cancer                | PANC-1 and PANC-GR          | Liraglutide                              | Positive (antitumor)                                  | Liraglutide decreased the chemotherapy resistance of pancreatic cancer cells to gemcitabine and increased the chemotherapy sensitivity <i>in vivo</i> and <i>in vitro</i> .                                                                                                                                       | (181)   |
| Byrd <i>et al</i> , 2015     | Rats and transgenic mice | <i>In vivo</i>                     | Thyroid cancer                   | -                           | Dulaglutide                              | Irrelevant (safety-focused rodent study)              | In transgenic mice, dulaglutide-associated C-cell hyperplasia or tumors were not observed at any dose. Diffuse increases in C-cell mass did not occur during the initial 52 weeks of the rat carcinogenicity study.                                                                                               | (185)   |
| Mao <i>et al</i> , 2024      | db/db mice               | <i>In vivo</i>                     | Nonalcoholic fatty liver disease | -                           | Semaglutide                              | Irrelevant (non-tumor disease model)                  | Semaglutide improved the gut microbiome, liver injury and lipid deposition in db/db mice.                                                                                                                                                                                                                         | (186)   |
| Chen <i>et al</i> , 2013     | Mice (BALB/c)            | <i>In vitro</i> and <i>in vivo</i> | Intrahepatic cholangiocarcinoma  | HuCC-T1 and HIBEpic         | Exendin-4                                | Positive (antitumor)                                  | Combination of oxaliplatin and exendin-4 could inhibit the proliferation of tumor cells and promote cell apoptosis.                                                                                                                                                                                               | (187)   |
| Koehler <i>et al</i> , 2011  | BALB/c mice              | <i>In vitro</i> and <i>in vivo</i> | Colon cancer                     | CT26                        | Exendin-4                                | Positive (antitumor)                                  | GLP-1R activation inhibited the proliferation and survival of CT26 colon cancer cells.                                                                                                                                                                                                                            | (152)   |
| Kissow <i>et al</i> , 2012   | CD1 mice                 | <i>In vivo</i>                     | Colon cancer                     | -                           | GLP-1RAs and DPP4 inhibitors             | Irrelevant (no clear tumor-promoting effect observed) | Growth-promoting effects of GLP-1 analogues on the intestine of healthy mice. No agonism of GLP-1RAs on GLP-2 receptors was found, and no cancer promoting effect of GLP-1 analogues was found.                                                                                                                   | (188)   |
| Iwaya <i>et al</i> , 2017    | Athymic mice             | <i>In vitro</i> and <i>in vivo</i> | Breast cancer                    | MCF-7, MDA-MB-231 and KPL-1 | Exendin-4                                | Positive (antitumor)                                  | Exendin-4 reduced Akt and I $\kappa$ B phosphorylation and attenuated breast cancer cell proliferation via activation of GLP-1R and subsequent inhibition of NF- $\kappa$ B activation.                                                                                                                           | (189)   |
| Ligumsky <i>et al</i> , 2024 | -                        | <i>In vitro</i>                    | Breast cancer                    | MCF-7 and MDA-MB-231        | Exendin-4 and liraglutide                | Positive (antitumor)                                  | Exendin-4 and liraglutide reduced the levels of glycolytic metabolites and reduced ATP production, indicating that GLP-1 analogues impaired glycolysis and affected tumor cell viability.                                                                                                                         | (190)   |
| Liu <i>et al</i> , 2022      | BALB/c/c3H mice          | <i>In vitro</i> and <i>in vivo</i> | Breast cancer                    | MDA-MB-231 and MDA-MB-468   | Liraglutide                              | Negative (pro-tumor)                                  | Slightly higher concentrations of liraglutide accelerated breast cancer progression <i>in vitro</i> and <i>in vivo</i> through NOX4/ROS/VEGF signaling after GLP-1R activation. GLP-1R inhibitor exendin- (9-39) inhibited the effect of liraglutide.                                                             | (13)    |
| Mao <i>et al</i> , 2021      | db/db mice               | <i>In vitro</i> and <i>in vivo</i> | Cervical cancer                  | CUP-1                       | Exendin-4                                | Positive (antitumor)                                  | Exendin-4 attenuated PSMA2 expression and tumor growth <i>in vivo</i> and <i>in vitro</i> .                                                                                                                                                                                                                       | (182)   |
| Kong <i>et al</i> , 2024     | Mice                     | <i>In vivo</i>                     | EC                               | -                           | Tirzepatide                              | Positive (antitumor)                                  | Tirzepatide reduced mouse body weight and tumor growth by modulating metabolic and immune pathways in EC tumors that differed between obese and lean mice.                                                                                                                                                        | (69)    |
| Zhang <i>et al</i> , 2021    | -                        | <i>In vitro</i>                    | EC                               | Ishikawa and HEC1B          | Exendin-4                                | Positive (antitumor)                                  | Exendin-4 could alleviate HG-induced cisplatin chemoresistance in EC cells.                                                                                                                                                                                                                                       | (183)   |
| Li <i>et al</i> , 2022       | BALB/c nude mice         | <i>In vitro</i> and <i>in vivo</i> | EC                               | Ishikawa and RL95-2         | Transfection of GLP-1R expression vector | Positive (antitumor)                                  | Upregulation of GLP-1R promoted EC cell apoptosis and activated the cAMP/PKA signaling pathway, while hindering the proliferation of mouse EC cells and tumor growth.                                                                                                                                             | (184)   |

<sup>a</sup>Positive indicates an antitumor effect; Negative indicates a tumor-promoting/pro-tumor effect; Irrelevant indicates that no direct antitumor or tumor-promoting effect was demonstrated, or that the study was a safety-focused/non-tumor model. DPP4, dipeptidyl peptidase-4; EC, endometrial cancer; GLP-1, glucagon-like peptide-1; GLP-1R, glucagon-like peptide-1 receptor; GLP-1RA, glucagon-like peptide-1 receptor agonist; GLP-2, glucagon-like peptide-2; HG, high glucose; NOX4, NADPH oxidase 4; PKA, protein kinase A; PSMA2, proteasome subunit  $\alpha$  type-2; ROS, reactive oxygen species.

Table SIII. Clinical studies of incretin- and glucagon-related drugs in different tumors.

| First author/s, year          | Research type                                                       | Objective                                                                                                                                                   | Drug                          | Disease           | Age, years                             | Sex ratio                                              | Sample size, n                          | With/without diabetes | Tumor-related interpretation <sup>a</sup>      | Adverse events                                                                                                                                                                                                                        | Main function (result)                                                                                                                         | (Refs.) |
|-------------------------------|---------------------------------------------------------------------|-------------------------------------------------------------------------------------------------------------------------------------------------------------|-------------------------------|-------------------|----------------------------------------|--------------------------------------------------------|-----------------------------------------|-----------------------|------------------------------------------------|---------------------------------------------------------------------------------------------------------------------------------------------------------------------------------------------------------------------------------------|------------------------------------------------------------------------------------------------------------------------------------------------|---------|
| Dankner <i>et al</i> , 2024   | Cohort study                                                        | GLP-1RA treatment was compared with basal insulin treatment                                                                                                 | GLP-1 RAs                     | Pancreatic cancer | Mean (SD), 59.9 (12.8)                 | 51% female                                             | 543,595                                 | T2DM                  | Irrelevant (no increased risk; safety-focused) | Not reported                                                                                                                                                                                                                          | No increased incidence of pancreatic cancer was found after initiation of GLP-1RA therapy over a 7-year period in adults with T2D in the study | (179)   |
| Wang <i>et al</i> , 2025      | Retrospective cohort study                                          | Pancreatic cancer incidence in patients receiving GLP-1RA versus non-GLP-1RA drugs was compared                                                             | GLP-1 RAs                     | Pancreatic cancer | -                                      | -                                                      | 1,636,056                               | T2DM                  | Positive (reduced risk)                        | Not reported                                                                                                                                                                                                                          | GLP-1RAs were associated with a decreased incidence of pancreatic cancer in patients with T2DM                                                 | (200)   |
| Monami <i>et al</i> , 2017    | Systematic review and meta-analysis of randomized controlled trials | To assess whether GLP-1RA treatment was associated with pancreatitis, pancreatic cancer, and cholelithiasis compared with placebo or non-GLP-1RA treatments | GLP-1 RAs                     | Pancreatic cancer | -                                      | -                                                      | 113                                     | T2DM                  | Irrelevant (safety-focused)                    | No significant increase in pancreatitis or pancreatic cancer was detected; cholelithiasis risk was increased (MH-OR, 1.30; 95% CI, 1.01-1.68)                                                                                         | GLP-1RA therapy was safe in pancreatitis and pancreatic cancer but was associated with an increased risk of cholelithiasis                     | (180)   |
| Pasternak <i>et al</i> , 2024 | Cohort study                                                        | Patients treated with GLP-1RA were compared with those treated with DPP4 inhibitors                                                                         | GLP-1 RAs and DPP4 inhibitors | Thyroid cancer    | -                                      | -                                                      | 437,077                                 | T2DM                  | Irrelevant (no substantial increased risk)     | Not reported                                                                                                                                                                                                                          | GLP-1RA use was not associated with a significant increase in thyroid cancer risk                                                              | (192)   |
| Bezin <i>et al</i> , 2023     | Case-control analysis                                               | Estimated GLP-1RA-associated thyroid cancer risk                                                                                                            | GLP-1 RAs                     | Thyroid cancer    | Median, 64                             | Female, 67.0 and 67.2%                                 | 2,562 cases and 45,184 control subjects | T2DM                  | Negative (increased risk)                      | Not reported                                                                                                                                                                                                                          | GLP-1 RA use for 1-3 years was associated with an increased risk of all thyroid cancers and medullary thyroid cancers                          | (193)   |
| Feier <i>et al</i> , 2024     | Systematic review                                                   | Incidence of thyroid cancer and spectrum of adverse events associated with semaglutide were assessed                                                        | GLP-1 RAs                     | Thyroid cancer    | Mean, 57.3                             | Male, 47.2%                                            | 14,550                                  | T2DM                  | Irrelevant (no clear thyroid cancer signal)    | Nausea (2.05-19.95%), diarrhea (1.4-13%), vomiting (5.97%), nasopharyngitis (8.23%); increased lipase, headache, decreased appetite, dyspepsia and constipation were also reported; serious adverse events ranged between 7 and 25.2% | Data from the study showed a thyroid cancer incidence of <1% in semaglutide-treated patients, indicating no significant risk.                  | (194)   |
| Wang <i>et al</i> , 2024      | Retrospective cohort study                                          | Evaluated the association of GLP-1RAs with the risk of HCC events in a real-world population                                                                | GLP-1RAs                      | HCC               | Mean (SD), 56.1 (11.9) vs. 56.3 (14.7) | Women, 54.6% vs. 56.2% after propensity score matching | 1,890,020                               | T2DM                  | Positive (reduced risk)                        | Not reported                                                                                                                                                                                                                          | GLP-1RA was associated with a reduced risk of HCC and hepatic decompensation in patients with T2DM compared with other antidiabetic agents     | (175)   |
| Newsome <i>et al</i> , 2021   | RCT: Double-blind phase 2 trial                                     | Evaluated the efficacy and safety of semaglutide in the treatment of NASH                                                                                   | Semaglutide                   | NASH              | Mean, 55                               | Female, 61%                                            | 320                                     | 62% T2DM              | Irrelevant (non-tumor trial)                   | Gastrointestinal disorders were the most common adverse events. In the semaglutide (0.4 mg) group versus the placebo group, nausea occurred in 42 vs. 11%, constipation in 22 vs. 12%, decreased appetite in 22 vs. 5%, vomiting in   | Semaglutide treatment resulted in a higher percentage of patients with NASH resolution than placebo                                            | (195)   |

|                              |                                |                                                                                                                         |                                |                            |                        |                                      |                                   |      |                                          |                                                                                                                                                                                                                                |              |                                                                                                                                                                                                                                                             |       |
|------------------------------|--------------------------------|-------------------------------------------------------------------------------------------------------------------------|--------------------------------|----------------------------|------------------------|--------------------------------------|-----------------------------------|------|------------------------------------------|--------------------------------------------------------------------------------------------------------------------------------------------------------------------------------------------------------------------------------|--------------|-------------------------------------------------------------------------------------------------------------------------------------------------------------------------------------------------------------------------------------------------------------|-------|
| Abrahami <i>et al</i> , 2018 | Cohort study                   | Determined whether medications that use incretin are associated with the risk of developing CRC in individuals with T2D | GLP-1 RAs and DPP4 inhibitors  | CRC                        | -                      | -                                    | 112,040                           | T2DM | Irrelevant (no association)              | 15 vs. 2% and abdominal pain in 7 vs. 4%; discontinuation due to adverse events occurred in 7 vs. 5%; serious adverse events in 15-19 vs. 10%; gallbladder-related disorders in 5-7 vs. 2%; no acute pancreatitis was reported | Not reported | Incretin use was not associated with CRC incidence in patients with T2D                                                                                                                                                                                     | (196) |
| Wang <i>et al</i> , 2024     | Retrospective cohort study     | GLP-1RAs were compared with seven non-GLP-1RA antidiabetic agents to analyze their CRC risk                             | GLP-1RAs                       | CRC                        | Mean (SD), 55.6 (12.3) | GLP-1RA(+)/insulin(-): female, 56.0% | 1,221,218                         | T2DM | Positive (reduced risk)                  | Not reported                                                                                                                                                                                                                   |              | GLP-1RAs were associated with reduced CRC risk in treatment-naive patients with T2D with and without obesity/overweight                                                                                                                                     | (73)  |
| Figlioli <i>et al</i> , 2024 | Systematic review              | Assessed GLP-1RA treatment of patients with gastrointestinal cancer risk                                                | GLP-1 RAs                      | Gastrointestinal neoplasms | Mean, 59.7             | Female, 43.4%                        | 124,791                           | T2DM | Irrelevant (no significant effect)       | Not reported                                                                                                                                                                                                                   |              | GLP-1RAs had no significant effect on the risk of gastrointestinal cancers, including liver, bile duct, gallbladder, esophagus, stomach, pancreatic, small bowel and colorectal cancer                                                                      | (197) |
| Piccoli <i>et al</i> , 2021  | Systematic review              | Risk of breast neoplasia in GLP-1RAs-treated patients was assessed                                                      | GLP-1RAs                       | Breast cancer              | -                      | -                                    | 90,360                            | T2DM | Irrelevant (no increased risk)           | Not reported                                                                                                                                                                                                                   |              | Treatment of obesity and diabetes with GLP-1RAs did not increase the risk of breast tumors                                                                                                                                                                  | (198) |
| Sun <i>et al</i> , 2024      | Mendelian randomization        | Causality analysis of GLP-1RA and cancer                                                                                | GLP1RAs                        | Breast cancer              | -                      | -                                    | 80,154 cases and 853,816 controls | T2DM | Positive (risk-reduction signal)         | Not reported                                                                                                                                                                                                                   |              | GLP1RA may reduce the risk of breast and basal cell carcinoma                                                                                                                                                                                               | (199) |
| Mao <i>et al</i> , 2021      | Transformed case-control study | Explored the relationship between GLP-1RA and cervical cancer                                                           | Exendin-4                      | Cervical cancer            | -                      | -                                    | -                                 | T2DM | Positive (tumor-suppressive association) | Not reported                                                                                                                                                                                                                   |              | PSMA2 and GLP-1R expression levels were elevated in cervical cancer specimens from patients with T2D, and PSMA2 expression was positively associated with GLP-1R expression. In addition, exendin-4 inhibited PSMA2 expression and suppressed tumor growth. | (182) |
| Wang <i>et al</i> , 2024     | Cohort study                   | Effects of insulin and GLP-1RAs on reducing the risk of specific OAC were compared                                      | GLP-1RAs, insulin or metformin | Endometrial cancer         | Mean (SD), 59.8 (15.1) | Male, 50.1%                          | 1,651,452                         | T2DM | Positive (reduced risk vs insulin)       | Not reported                                                                                                                                                                                                                   |              | GLP-1RAs were associated with a reduced risk of endometrial cancer compared with insulin                                                                                                                                                                    | (73)  |

Values are presented as mean (SD) unless otherwise specified. aPositive indicates a favorable antitumor association or reduced cancer risk; Negative indicates a tumor-promoting association or increased cancer risk; Irrelevant indicates no significant tumor-related association, a safety-focused finding, or a non-tumor clinical outcome. CRC, colorectal cancer; DPP4, dipeptidyl peptidase-4; GLP-1R, glucagon-like peptide-1 receptor; GLP-1RA, glucagon-like peptide-1 receptor agonist; HCC, hepatocellular carcinoma; MH-OR, Mantel-Haenszel odds ratio; NASH, nonalcoholic steatohepatitis; NR, not reported; OAC, obesity-associated cancer; PSMA2, proteasome subunit  $\alpha$  type-2; RCT, randomized controlled trial; T2D, type 2 diabetes; T2DM, type 2 diabetes mellitus.
